# Supplementary material
Source: publisher figshare collection journal article supplement (https://acs.figshare.com/ndownloader/files/4728703)
Supplement: Supplementary file 1 [file 4728703]

# XAFS Studies of Nickel and Sulfur Speciation in Residual Oil Fly-Ash Particulate Matters (ROFA PM)

*Sidhartha Pattanaik,<sup>†,‡,\*</sup> Frank E. Huggins,<sup>‡</sup> Gerald P. Huffman,<sup>‡</sup> William P. Linak,<sup>§</sup> and C.*

*Andrew Miller<sup>§</sup>*

<sup>†</sup>Central Electrochemical Research Institute, Karaikudi – 630 006, Tamilnadu, INDIA

<sup>‡</sup>CFFS/CME, University of Kentucky, 533 S. Limestone St., Lexington, KY 40506-0043, USA

<sup>§</sup>NRMRI, Environmental Protection Agency, Research Triangle Park, NC-27711, USA

Summary:

No of Pages: 5

No. of Figures: 8

No of Tables: 1

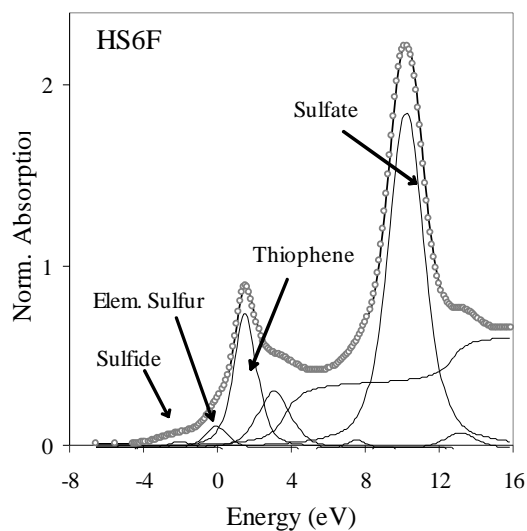

Figure S1. S K-edge XANES spectrum of HS6F (000) and the calculated fit (—), deconvoluted individual components (---) are shown underneath the fit.

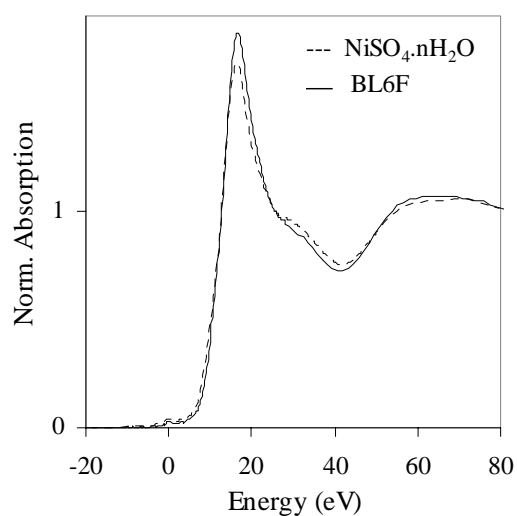

Figure S2. Normalized Ni K-edge XANES spectra of BL6F (—) and NiSO<sub>4</sub>.nH<sub>2</sub>O (-----).

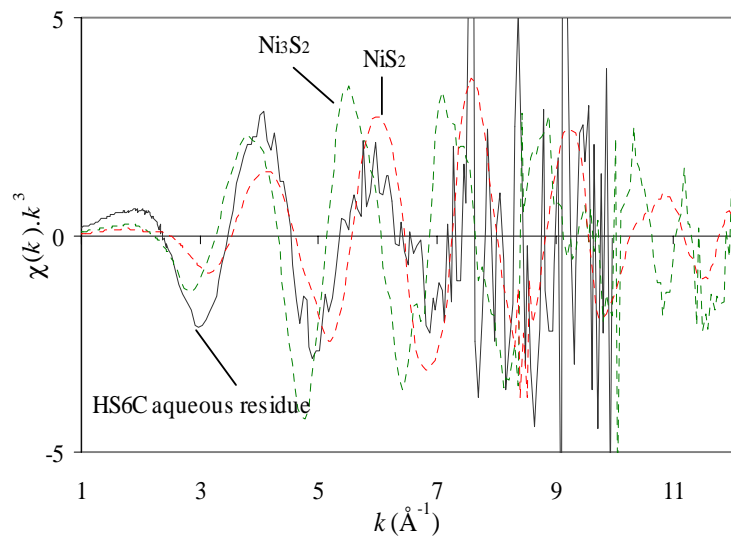

Figure S3. Ni K-edge EXAFS of HS6C residue,  $\text{Ni}_3\text{S}_2$ , and  $\text{NiS}_2$ .

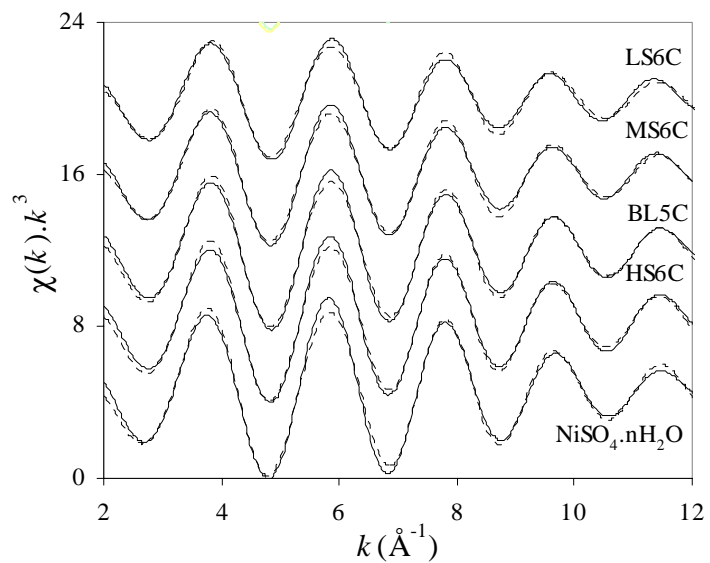

Figure S4. Back-transformed 1<sup>st</sup> shell Ni-O EXAFS (—) and calculated pattern (---) based on  $\text{NiO}_N$  model, where the coordination number  $N$  was subjected to variation.

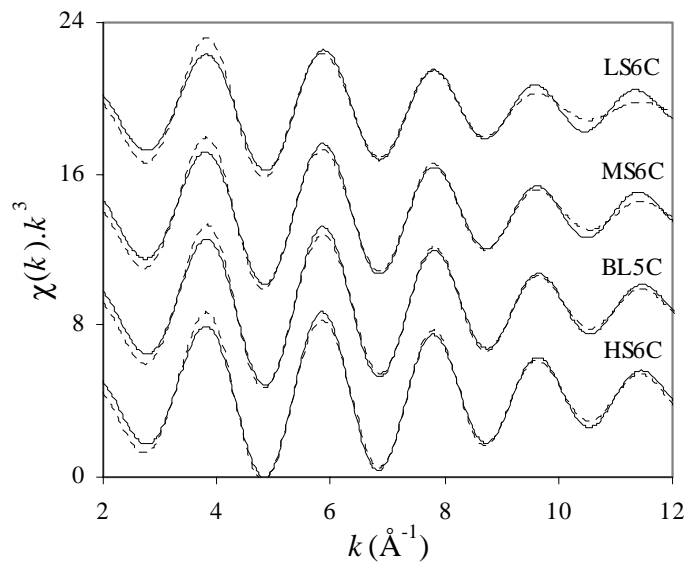

Figure S5. Back-transformed 1<sup>st</sup> shell Ni-O EXAFS (—) and calculated pattern (---) based on  $\text{NiO}_6$  model, where the coordination number was fixed at six.

Table S1. Ni coordination in ROFA  $\text{PM}_{2.5+}$ : distance (d), Debye-Waller factor ( $\sigma^2$ ), coordination number (N) and energy shift ( $\Delta E_o$ ).

| Sample                                    | shell | d/ $\text{\AA}$ | $\sigma^2/\text{\AA}^2$ | N | $\Delta E_o/\text{eV}$ | $\Delta k/\text{\AA}^{-1}$ | R    |
|-------------------------------------------|-------|-----------------|-------------------------|---|------------------------|----------------------------|------|
| $\text{NiSO}_4 \cdot n\text{H}_2\text{O}$ | Ni-O  | 2.05            | 0.007                   | 6 | -3.7                   | 2.0-12.0                   | 9    |
| HS6C                                      | Ni-O  | 2.06            | 0.007                   | 6 | -1.9                   | 2.0-12.0                   | 11.5 |
| BL5C                                      | Ni-O  | 2.06            | 0.008                   | 6 | -1.5                   | 2.0-12.0                   | 12.2 |
| MS6C                                      | Ni-O  | 2.06            | 0.009                   | 6 | -1.8                   | 2.0-12.0                   | 15.1 |
| LS6C                                      | Ni-O  | 2.07            | 0.011                   | 6 | -1.1                   | 2.0-12.0                   | 20.1 |

$S_o^2 = 0.9$ , R – residual factor (in %).

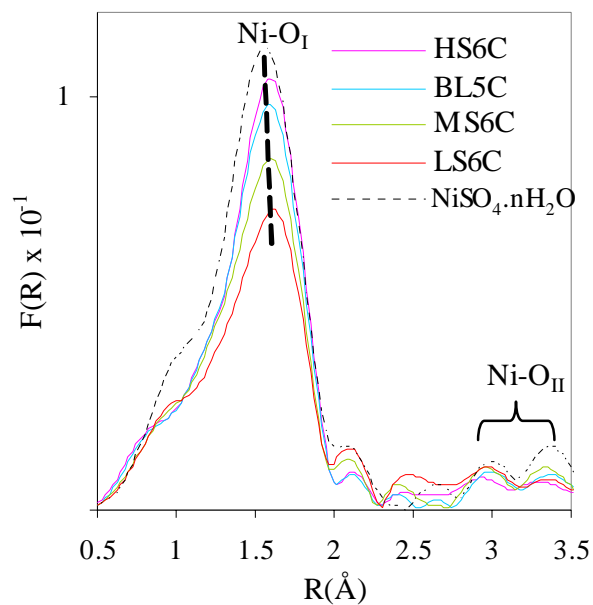

Figure S6. RSF of all four PM<sub>2.5+</sub> samples from FTB compared with that of  $\text{NiSO}_4 \cdot n\text{H}_2\text{O}$

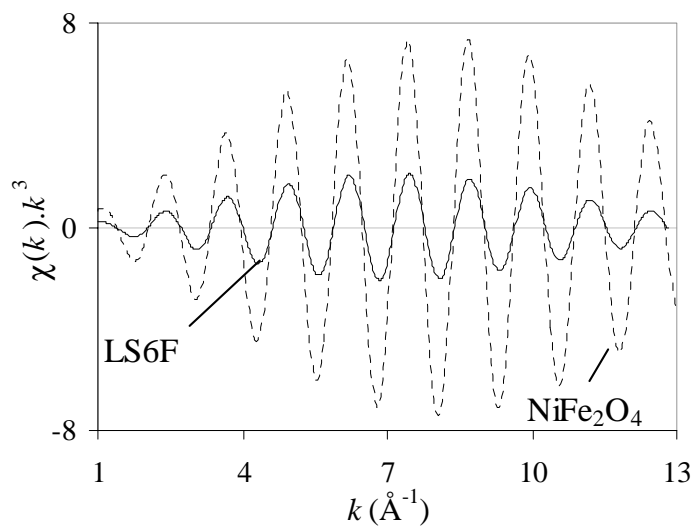

Figure S7. Back-transformed Ni-(Ni/Fe) RSF peak of LS6F compared with that of  $\text{NiFe}_2\text{O}_4$ .

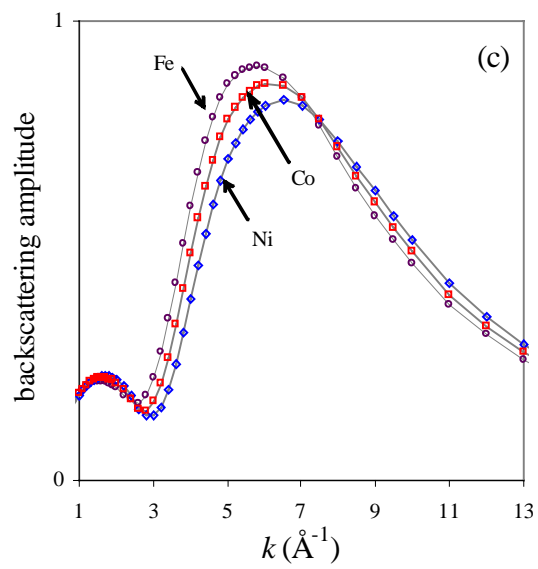

Figure S8. Backscattering amplitudes of Fe, Co, and Ni.
